# Supplementary material for: Pharmacokinetics, Pharmacodynamics, and Safety of Peficitinib (ASP015K) in Healthy Male Caucasian and Japanese Subjects
Source: PubMed Central journal article supplement — Clin Drug Investig. 2020 Apr 9;40(5):469–84. doi: 10.1007/s40261-020-00910-w (PMC7181426; doi:10.1007/s40261-020-00910-w), 2020-04-09
Supplement: 40261_2020_910_MOESM1_ESM.pdf [file 40261_2020_910_MOESM1_ESM.pdf]

## SUPPLEMENTARY INFORMATION

### *Clinical Drug Investigation*

**Title:** Pharmacokinetics, pharmacodynamics and safety of peficitinib (ASP015K) in healthy male Caucasian and Japanese subjects

**Authors:** Mai Shibata, BS<sup>1</sup>, Toshifumi Hatta, PhD<sup>1</sup>, Masako Saito, MSc<sup>1</sup>, Junko Toyoshima, MSc<sup>1</sup>, Yuichiro Kaneko, MSc<sup>1</sup>, Kazuo Oda, PhD<sup>2</sup>, Tetsuya Nishimura, MSc<sup>1</sup>

**Affiliations:** <sup>1</sup>Astellas Pharma Inc., Tokyo, Japan; <sup>2</sup>Astellas Research Institute of America LLC, Northbrook, IL, USA

**Supplementary Table S1.** Lymphocyte subsets

|    | <b>Subset</b>                         | <b>Cell type</b>        |
|----|---------------------------------------|-------------------------|
| 1  | CD45+, CD3+, CD4+, CD45RA+, CD28+     | Naïve T cells           |
| 2  | CD45+, CD3+, CD4+, CD45RA+, CD28(-)   | Effector T cells        |
| 3  | CD45+, CD3+, CD4+, CD45RA(-), CD28(-) | Effector memory T cells |
| 4  | CD45+, CD3+, CD4+, CD45RA(-), CD28+   | Central memory T cells  |
| 5  | CD45+, CD3+, CD8+, CD45RA+, CD28+     | Naïve T cells           |
| 6  | CD45+, CD3+, CD8+, CD45RA+, CD28(-),  | Effector T cells        |
| 7  | CD45+, CD3+, CD8+, CD45RA(-), CD28(-) | Effector memory T cells |
| 8  | CD45+, CD3+, CD8+, CD45RA(-), CD28+   | Central memory T cells  |
| 9  | CD3+, CD4+, CD45RA(-)                 | Total CD4+ memory       |
| 10 | CD3+, CD8+, CD45RA(-)                 | Total CD8+ memory       |
| 11 | CD3+, CD4+, CD45RA +                  | Total CD4+ naïve        |
| 12 | CD3+, CD8+, CD45RA+                   | Total CD8+ naïve        |
| 13 | CD3+, CD45RA+                         | Total naïve             |
| 14 | CD3+, CD45RA(-)                       | Total memory            |
| 15 | CD45+, CD3+, CD4+, CD25+, CD127low    | T regulatory cells      |

**Supplementary Table S2.** Mean percentage change from baseline in peripheral lymphocyte subsets (single-dose study, Japanese and Caucasian subjects)

|                                                                       | Peficitinib dose              |                |                |                 |
|-----------------------------------------------------------------------|-------------------------------|----------------|----------------|-----------------|
|                                                                       | Placebo <sup>a</sup><br>(n=6) | 20 mg<br>(n=6) | 60 mg<br>(n=6) | 200 mg<br>(n=6) |
| <b>CD45+, CD3+, CD4+, CD45RA+, CD28+, naïve T cells</b>               |                               |                |                |                 |
| Japanese                                                              | -2.13                         | 0.80           | -1.57          | 2.35            |
| Caucasian                                                             | -1.53                         | -1.47          | -0.68          | -1.65           |
| <b>CD45+, CD3+, CD4+, CD45RA+, CD28(-), effector T cells</b>          |                               |                |                |                 |
| Japanese                                                              | 0                             | 0.05           | 0.15           | -0.05           |
| Caucasian                                                             | -0.02                         | 0              | 0.03           | 0.05            |
| <b>CD45+, CD3+, CD4+, CD45RA(-), CD28(-), effector memory T cells</b> |                               |                |                |                 |
| Japanese                                                              | 0.13                          | 0.07           | 0.20           | -0.33           |
| Caucasian                                                             | 0.02                          | 0.03           | 0.02           | 0.23            |
| <b>CD45+, CD3+, CD4+, CD45RA(-), CD28+, central memory T cells</b>    |                               |                |                |                 |
| Japanese                                                              | -1.13                         | 0.02           | 0.17           | 1.00            |
| Caucasian                                                             | -1.20                         | -1.28          | -0.52          | 0.08            |
| <b>CD45+, CD3+, CD8+, CD45RA+, CD28+, naïve T cells</b>               |                               |                |                |                 |
| Japanese                                                              | -1.92                         | -0.15          | -1.87          | 0.15            |
| Caucasian                                                             | -0.75                         | -0.50          | -0.52          | -1.20           |
| <b>CD45+, CD3+, CD8+, CD45RA+, CD28(-), effector T cells</b>          |                               |                |                |                 |
| Japanese                                                              | 0.52                          | 0.42           | 0.38           | -1.15           |
| Caucasian                                                             | 0.40                          | 0.23           | -0.12          | 0.47            |
| <b>CD45+, CD3+, CD8+, CD45RA(-), CD28(-), effector memory T cells</b> |                               |                |                |                 |
| Japanese                                                              | 0.47                          | 0.03           | 0.18           | -0.43           |
| Caucasian                                                             | 0.12                          | 0.18           | 0.33           | 0.25            |
| <b>CD45+, CD3+, CD8+, CD45RA(-), CD28+, central memory T cells</b>    |                               |                |                |                 |
| Japanese                                                              | 0.28                          | -0.32          | 0.45           | 0.13            |
| Caucasian                                                             | 0.17                          | -0.12          | 0.93           | 0.53            |
| <b>CD3+, CD4+, CD45RA(-), total CD4+ memory</b>                       |                               |                |                |                 |
| Japanese                                                              | -0.97                         | 0.05           | 0.37           | 0.62            |
| Caucasian                                                             | -1.20                         | -1.27          | -0.50          | 0.30            |
| <b>CD3+, CD8+, CD45RA(-), total CD8+ memory</b>                       |                               |                |                |                 |
| Japanese                                                              | 0.70                          | -0.30          | 0.62           | -0.25           |
| Caucasian                                                             | 0.30                          | 0.07           | 1.25           | 0.80            |
| <b>CD3+, CD4+, CD45RA+, total CD4+ naïve</b>                          |                               |                |                |                 |
| Japanese                                                              | -2.13                         | 0.73           | -1.33          | 2.37            |
| Caucasian                                                             | -1.53                         | -1.48          | -0.62          | -1.58           |
| <b>CD3+, CD8+, CD45RA+, total CD8+ naïve</b>                          |                               |                |                |                 |
| Japanese                                                              | -1.42                         | 0.23           | -1.43          | -0.97           |

|                                                                |       |       |       |       |
|----------------------------------------------------------------|-------|-------|-------|-------|
| Caucasian                                                      | -0.33 | -0.28 | -0.63 | -0.75 |
| <b>CD3+, CD45RA+, total naïve</b>                              |       |       |       |       |
| Japanese                                                       | -2.35 | 0.50  | -2.00 | 0.02  |
| Caucasian                                                      | -1.33 | -1.65 | -1.07 | -2.88 |
| <b>CD3+, CD45RA(-), total memory</b>                           |       |       |       |       |
| Japanese                                                       | -0.48 | -0.17 | 0.83  | 0.53  |
| Caucasian                                                      | -0.63 | -1.03 | -0.02 | 1.25  |
| <b>CD45+, CD3+, CD4+, CD25+, CD127 low, T regulatory cells</b> |       |       |       |       |
| Japanese                                                       | -0.12 | 0.57  | -0.38 | 0.48  |
| Caucasian                                                      | -0.25 | -0.42 | -0.38 | -0.13 |

---

<sup>a</sup>Data for subjects receiving placebo were pooled

**Supplementary Table S3.** Mean percentage change from baseline in peripheral lymphocyte subsets (multiple-dose study, Japanese subjects) (PDAS)

| Lymphocyte subset/<br>time point                                      | Placebo bid <sup>a</sup><br>(n=6) | Peficitinib dose   |                    |                     |
|-----------------------------------------------------------------------|-----------------------------------|--------------------|--------------------|---------------------|
|                                                                       |                                   | 10 mg bid<br>(n=6) | 30 mg bid<br>(n=6) | 100 mg bid<br>(n=6) |
| <b>CD45+, CD3+, CD4+, CD45RA+, CD28+, naïve T cells</b>               |                                   |                    |                    |                     |
| Day 4, pre-dose                                                       | -1.87                             | -1.57              | -0.72              | -2.77               |
| Day 7, pre-dose                                                       | 0.48                              | -3.72              | -1.35              | -3.32               |
| Day 7, 72 h post-dose                                                 | -2.13                             | -4.67              | -0.77              | -4.82               |
| <b>CD45+, CD3+, CD4+, CD45RA+, CD28(-), effector T cells</b>          |                                   |                    |                    |                     |
| Day 4, pre-dose                                                       | 0.20                              | 0.00               | -0.02              | -0.08               |
| Day 7, pre-dose                                                       | 0.82                              | 0.12               | -0.05              | -0.18               |
| Day 7, 72 h post-dose                                                 | 0.38                              | 0.10               | 0.02               | 0.02                |
| <b>CD45+, CD3+, CD4+, CD45RA(-), CD28(-), effector memory T cells</b> |                                   |                    |                    |                     |
| Day 4, pre-dose                                                       | 0.17                              | 0.08               | 0.08               | 0.38                |
| Day 7, pre-dose                                                       | 0.23                              | 0.35               | 0.05               | 0.13                |
| Day 7, 72 h post-dose                                                 | 0.22                              | 0.42               | 0.03               | 0.18                |
| <b>CD45+, CD3+, CD4+, CD45RA(-), CD28+, central memory T cells</b>    |                                   |                    |                    |                     |
| Day 4, pre-dose                                                       | 0.62                              | 0.10               | -1.07              | -1.40               |
| Day 7, pre-dose                                                       | -1.18                             | 0.55               | 0.32               | -0.80               |
| Day 7, 72 h post-dose                                                 | -0.87                             | -0.43              | -0.92              | -0.75               |
| <b>CD45+, CD3+, CD8+, CD45RA+, CD28+, naïve T cells</b>               |                                   |                    |                    |                     |
| Day 4, pre-dose                                                       | 0.27                              | 0.75               | -0.83              | -3.20               |
| Day 7, pre-dose                                                       | 0.35                              | -0.98              | -1.33              | -3.87               |
| Day 7, 72 h post-dose                                                 | -0.63                             | -1.87              | -1.07              | -4.38               |
| <b>CD45+, CD3+, CD8+, CD45RA+, CD28(-), effector T cells</b>          |                                   |                    |                    |                     |
| Day 4, pre-dose                                                       | -0.18                             | 0.03               | -0.15              | 0.57                |
| Day 7, pre-dose                                                       | -0.77                             | 0.28               | -0.13              | 0.05                |
| Day 7, 72 h post-dose                                                 | 0.77                              | 0.43               | 0.33               | 0.27                |
| <b>CD45+, CD3+, CD8+, CD45RA(-), CD28(-), effector memory T cells</b> |                                   |                    |                    |                     |
| Day 4, pre-dose                                                       | -0.27                             | -0.17              | 0.13               | 0.18                |
| Day 7, pre-dose                                                       | -0.10                             | -0.03              | 0.22               | 0.18                |
| Day 7, 72 h post-dose                                                 | 0.02                              | 0.03               | 0.32               | 0.18                |
| <b>CD45+, CD3+, CD8+, CD45RA(-), CD28+, central memory T cells</b>    |                                   |                    |                    |                     |
| Day 4, pre-dose                                                       | 0.17                              | -0.48              | 0.42               | -0.12               |
| Day 7, pre-dose                                                       | 0.55                              | -0.28              | 1.15               | 0.38                |
| Day 7, 72 h post-dose                                                 | 0.48                              | -0.33              | 0.27               | -0.33               |
| <b>CD3+, CD4+, CD45RA(-), total CD4+ memory</b>                       |                                   |                    |                    |                     |
| Day 4, pre-dose                                                       | 0.83                              | 0.18               | -1.02              | -1.03               |
| Day 7, pre-dose                                                       | -0.92                             | 0.95               | 0.38               | -0.72               |

|                                                                |       |       |       |       |
|----------------------------------------------------------------|-------|-------|-------|-------|
| Day 7, 72 h post-dose                                          | -0.57 | 0.02  | -0.83 | -0.57 |
| <b>CD3+, CD8+, CD45RA(-), total CD8+ memory</b>                |       |       |       |       |
| Day 4, pre-dose                                                | -0.08 | -0.62 | 0.52  | 0.05  |
| Day 7, pre-dose                                                | 0.48  | -0.32 | 1.37  | 0.53  |
| Day 7, 72 h post-dose                                          | 0.50  | -0.25 | 0.57  | -0.15 |
| <b>CD3+, CD4+, CD45RA+, total CD4+ naïve</b>                   |       |       |       |       |
| Day 4, pre-dose                                                | -1.65 | -1.47 | -0.65 | -2.73 |
| Day 7, pre-dose                                                | 1.25  | -3.47 | -1.37 | -3.42 |
| Day 7, 72 h post-dose                                          | -1.68 | -4.38 | -0.70 | -4.65 |
| <b>CD3+, CD8+, CD45RA+, total CD8+ naïve</b>                   |       |       |       |       |
| Day 4, pre-dose                                                | 0.08  | 0.75  | -1.05 | -2.60 |
| Day 7, pre-dose                                                | -0.42 | -0.70 | -1.48 | -3.80 |
| Day 7, 72 h post-dose                                          | 0.13  | -1.45 | -0.77 | -4.07 |
| <b>CD3+, CD45RA+, total naïve</b>                              |       |       |       |       |
| Day 4, pre-dose                                                | -1.53 | -1.55 | -1.25 | -4.68 |
| Day 7, pre-dose                                                | 0.15  | -5.35 | -2.52 | -6.47 |
| Day 7, 72 h post-dose                                          | -0.80 | -6.30 | -1.30 | -7.50 |
| <b>CD3+, CD45RA(-), total memory T cells</b>                   |       |       |       |       |
| Day 4, pre-dose                                                | 1.90  | 1.02  | -0.37 | -0.93 |
| Day 7, pre-dose                                                | 2.23  | 2.72  | 1.93  | -0.02 |
| Day 7, 72 h post-dose                                          | 0.33  | 1.70  | -0.42 | -0.93 |
| <b>CD45+, CD3+, CD4+, CD25+, CD127 low, T regulatory cells</b> |       |       |       |       |
| Day 4, pre-dose                                                | -0.23 | -1.08 | -0.17 | -0.52 |
| Day 7, pre-dose                                                | -0.12 | -1.20 | -0.18 | -0.68 |
| Day 7, 72 h post-dose                                          | -0.30 | -1.27 | -0.28 | -0.48 |

---

Bid, twice daily; PDAS, pharmacodynamic analysis set  
<sup>a</sup>Data for subjects receiving placebo were pooled
